# Supplementary material
Source: Springer Nature journal article supplement (https://www.springermedizin.de/resource/supplementary/13054_2012_620_MOESM4_ESM.pdf/9708856)

GEDV<sub>VolumeView</sub> vs. GEDV<sub>PiCCO</sub>

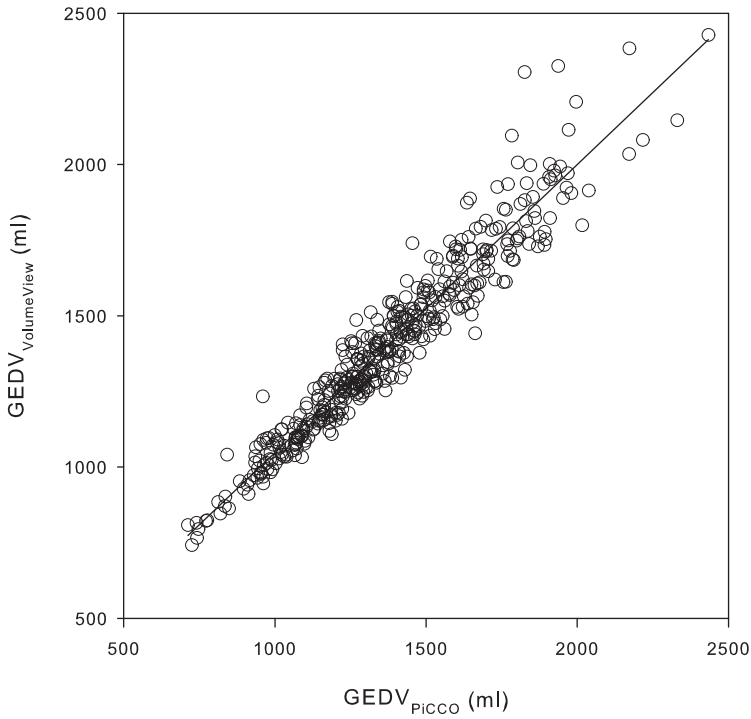

Bland Altman Plot GEDV

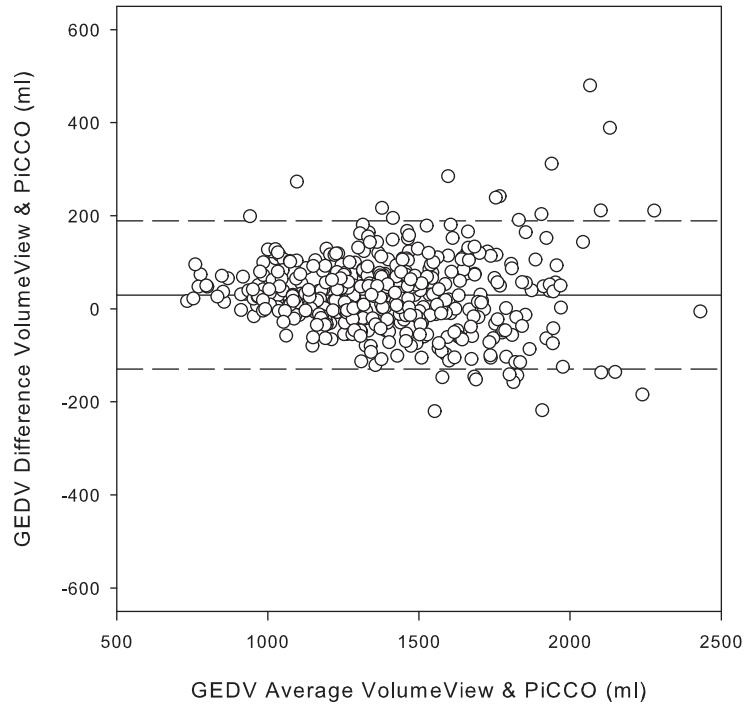

% Change GEDV (10% exclusion zone)

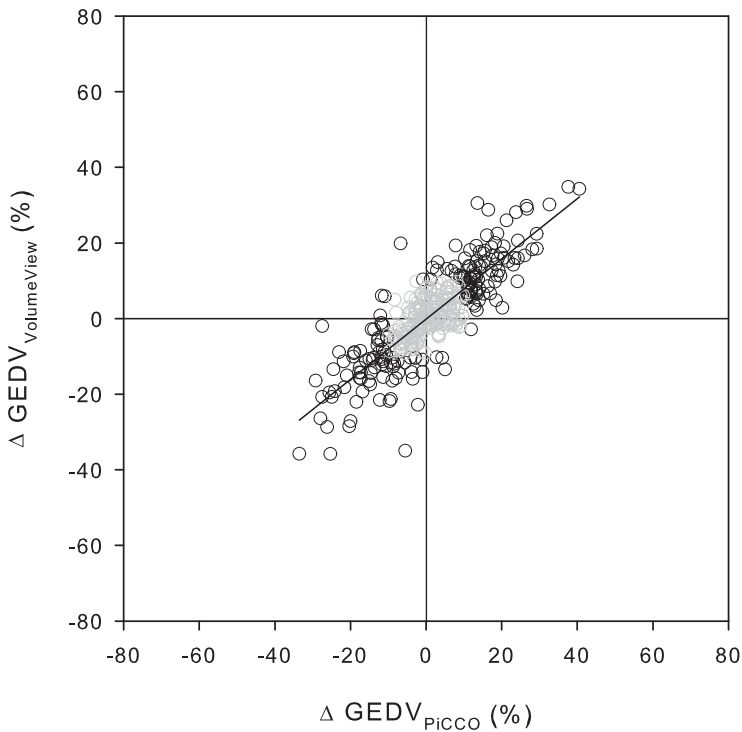

Polar Plot % Change GEDV

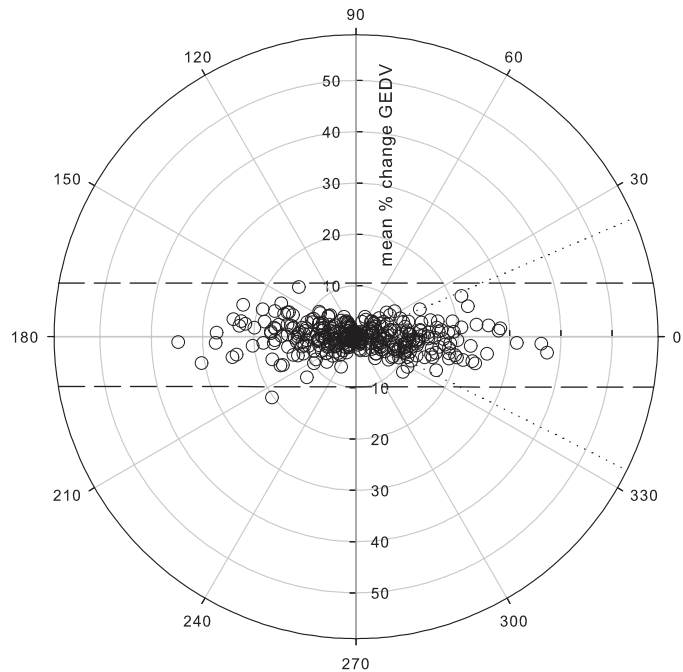

Supplement: MOESM4 [file 9708856]
